# Supplementary material
Source: publisher site journal article supplement (https://www.dovepress.com/article/148662)
Supplement: Supplementary file 1 [file get_supplementary_file.php]

A

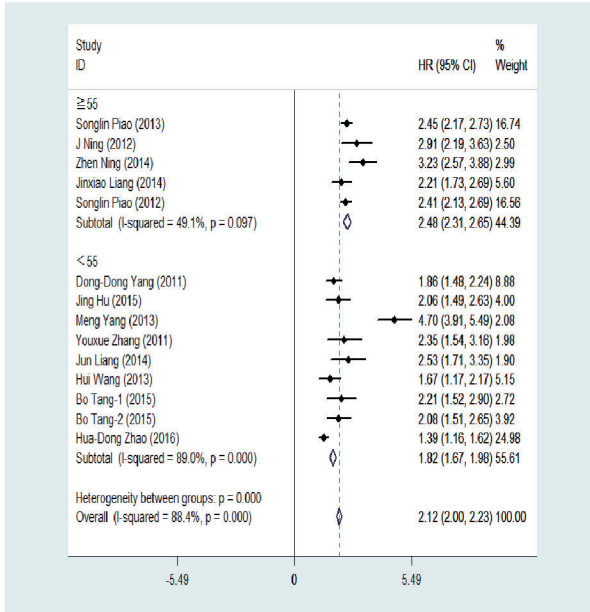

B

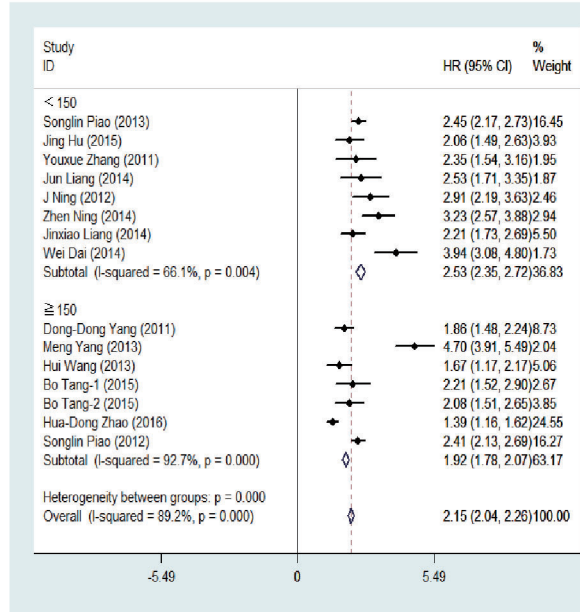

C

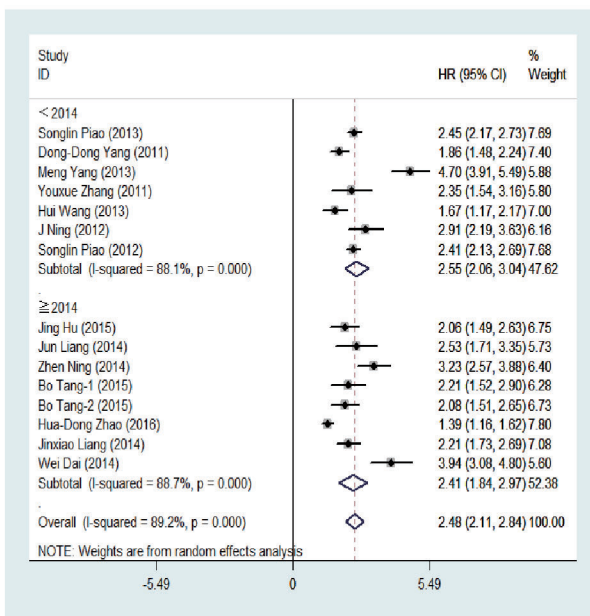

D

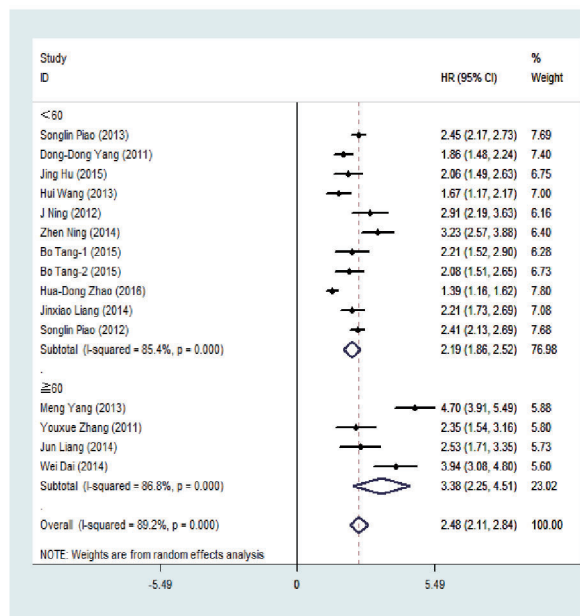

E

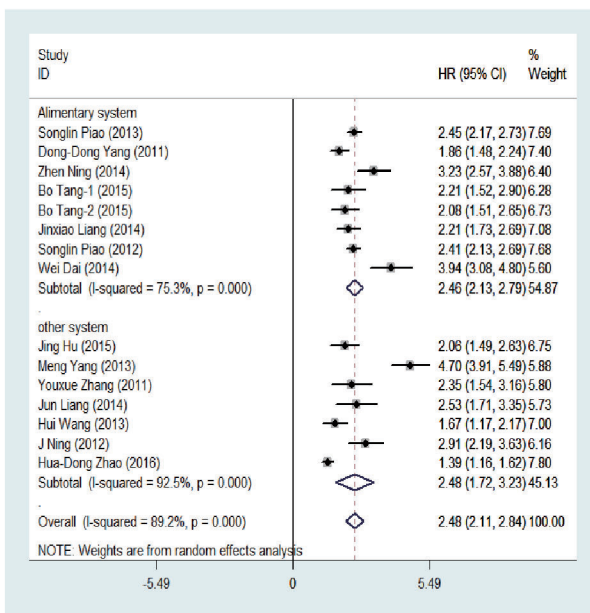

A

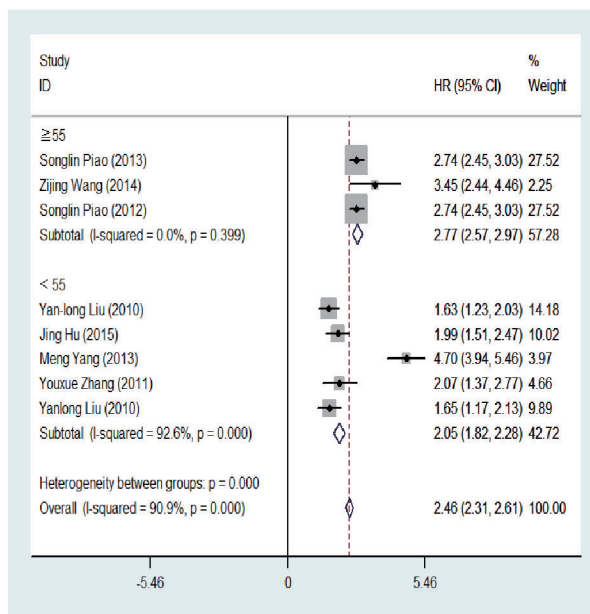

B

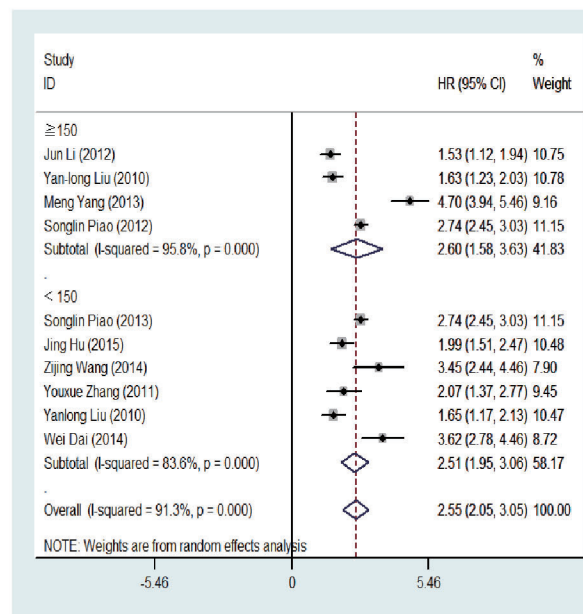

C

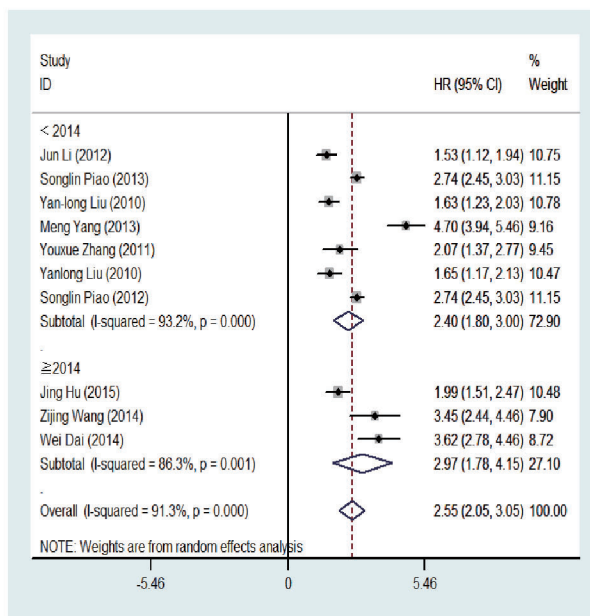

D

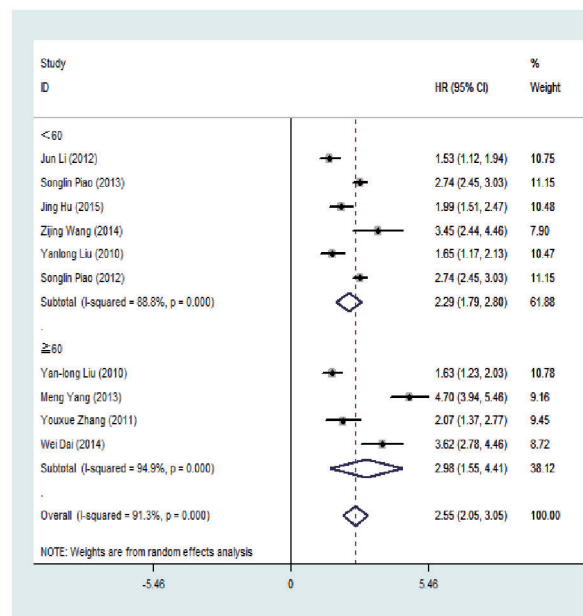

E

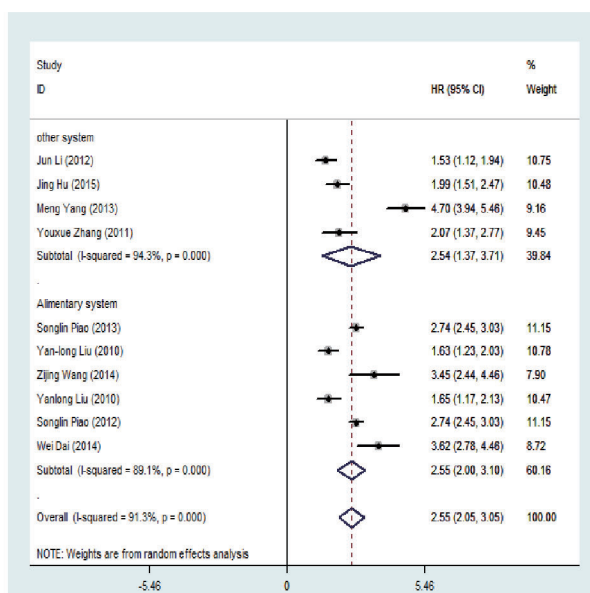

A

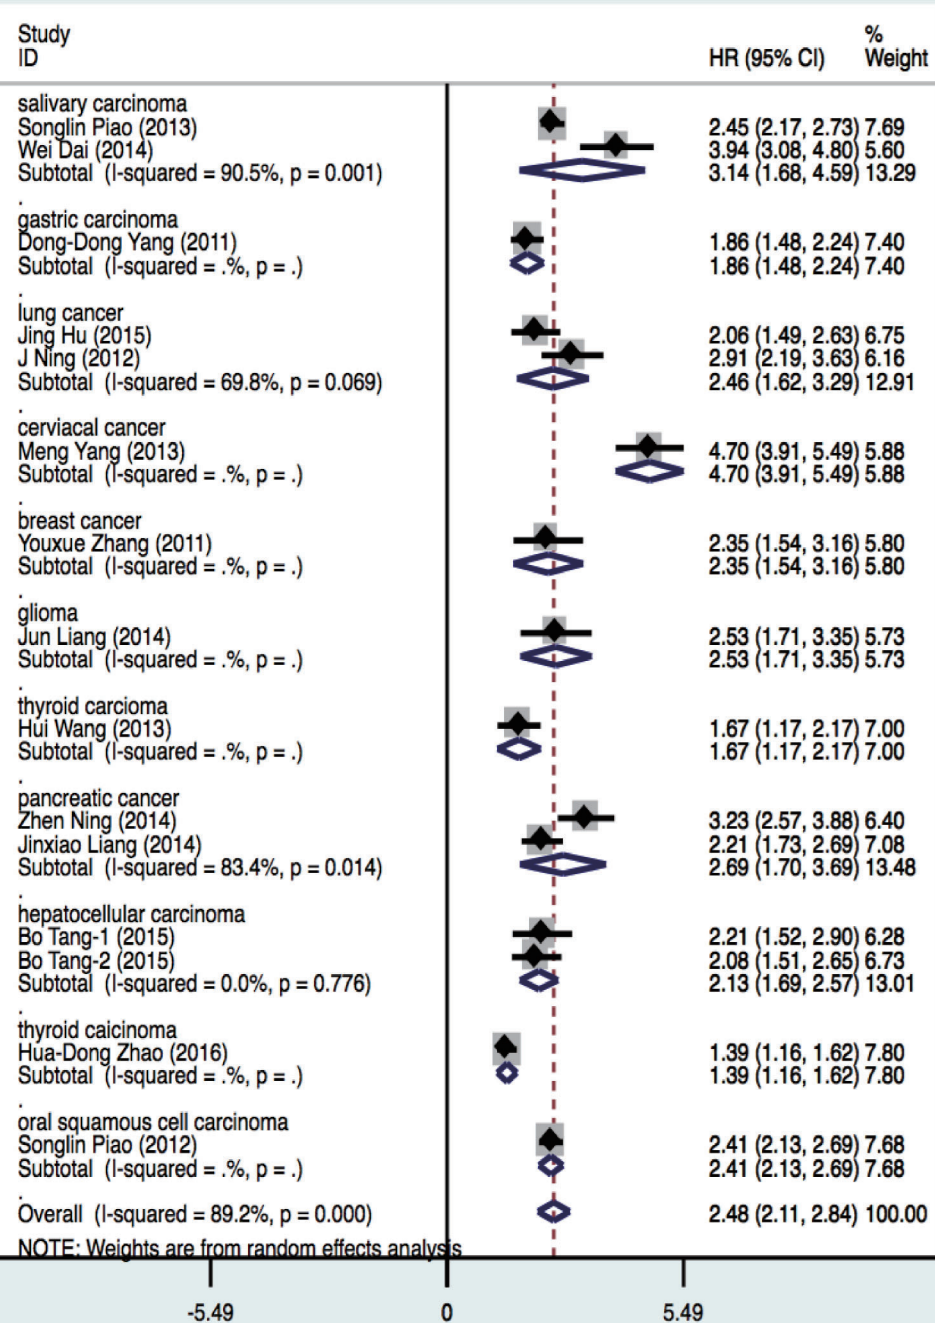

B

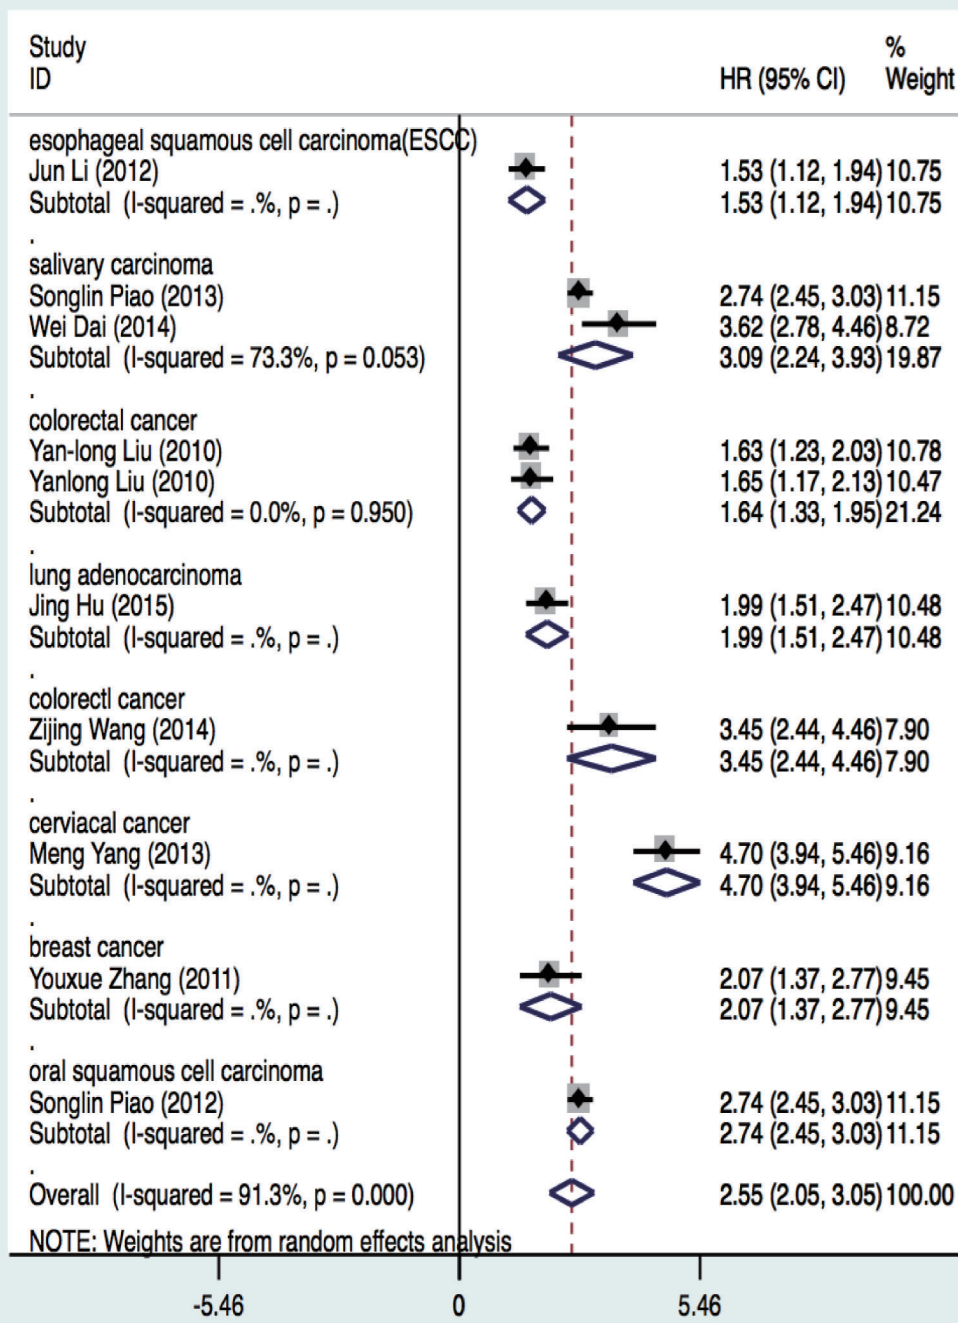

A

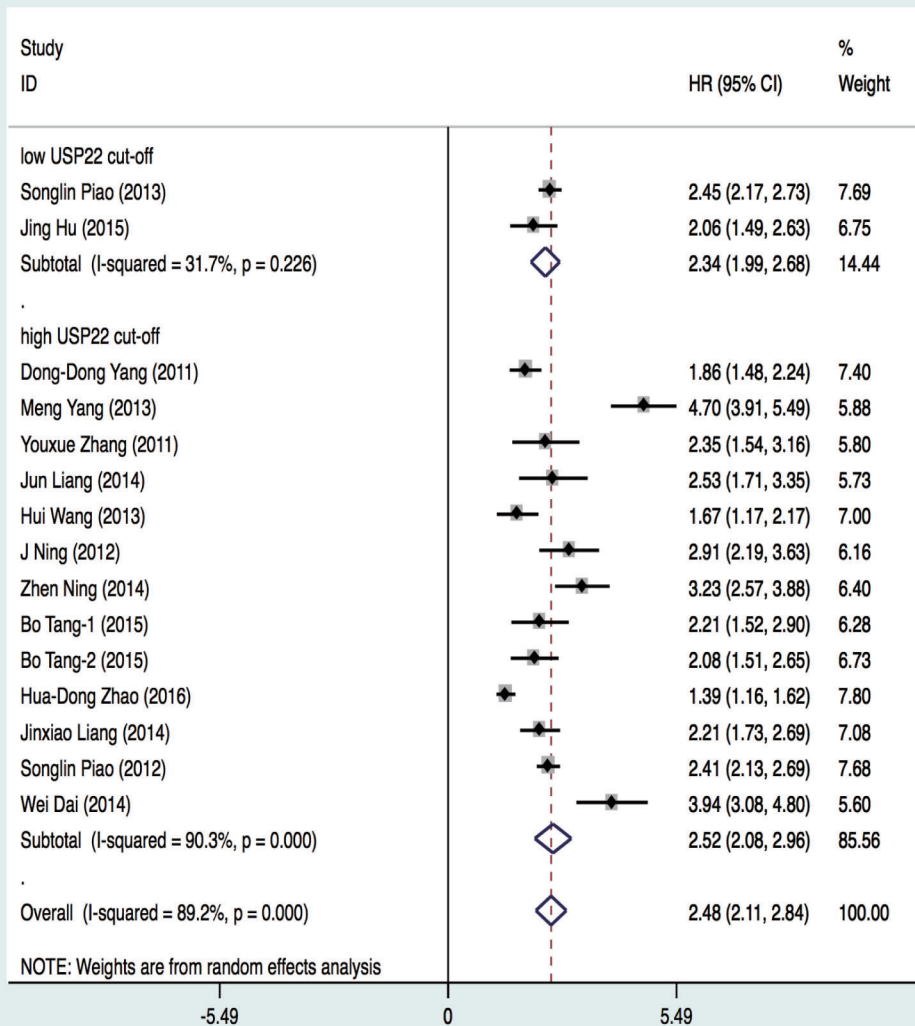

B

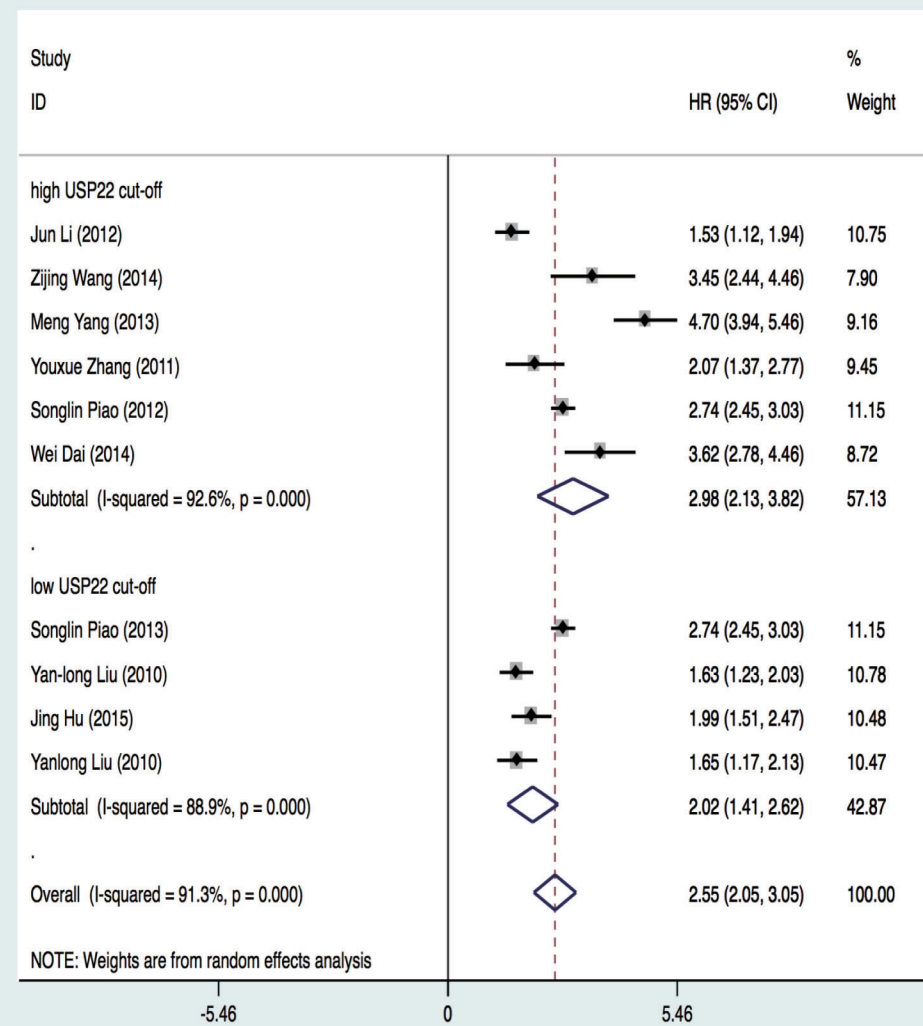

A

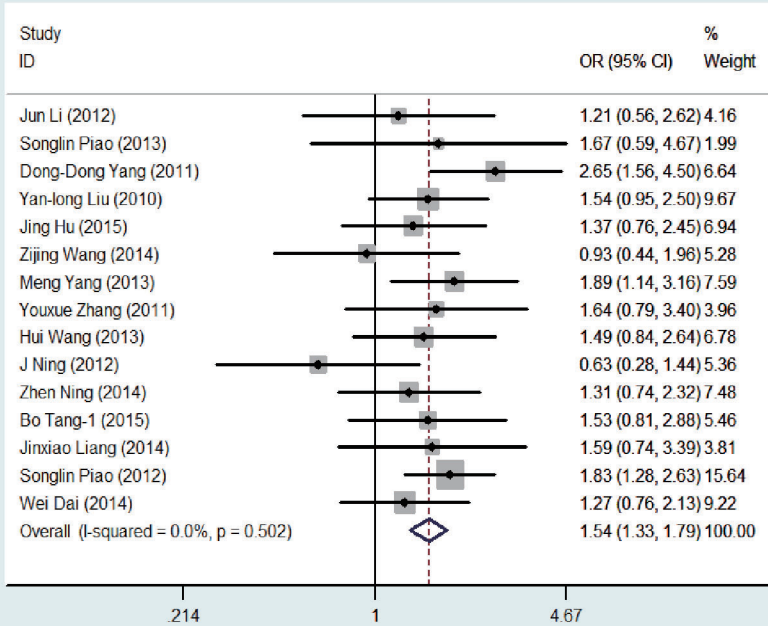

B

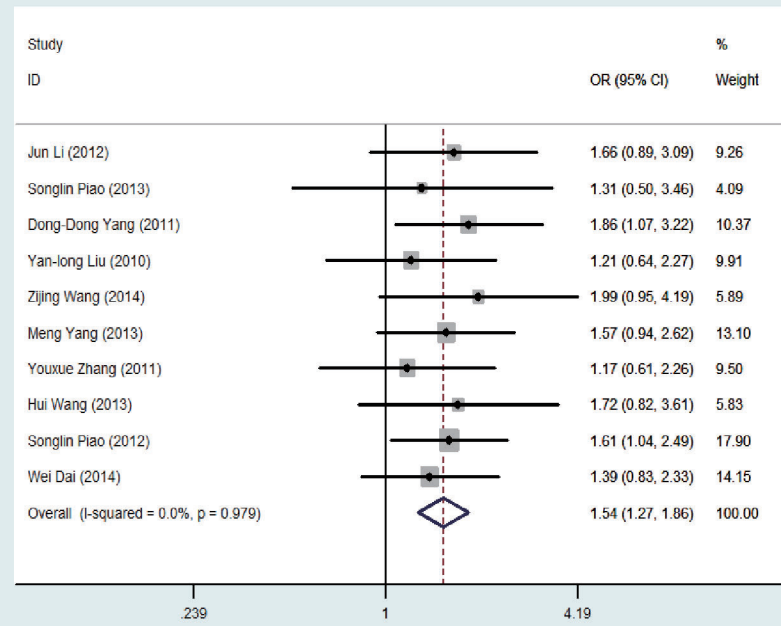

C

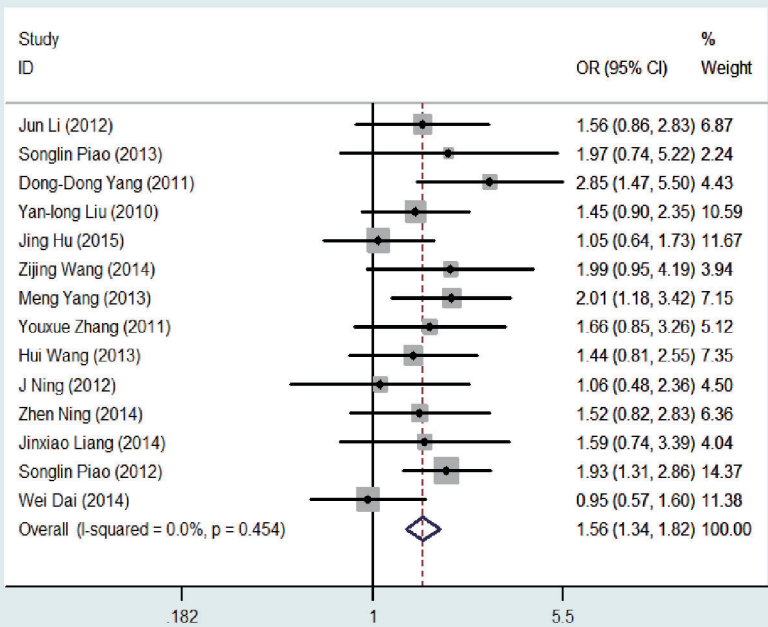

D

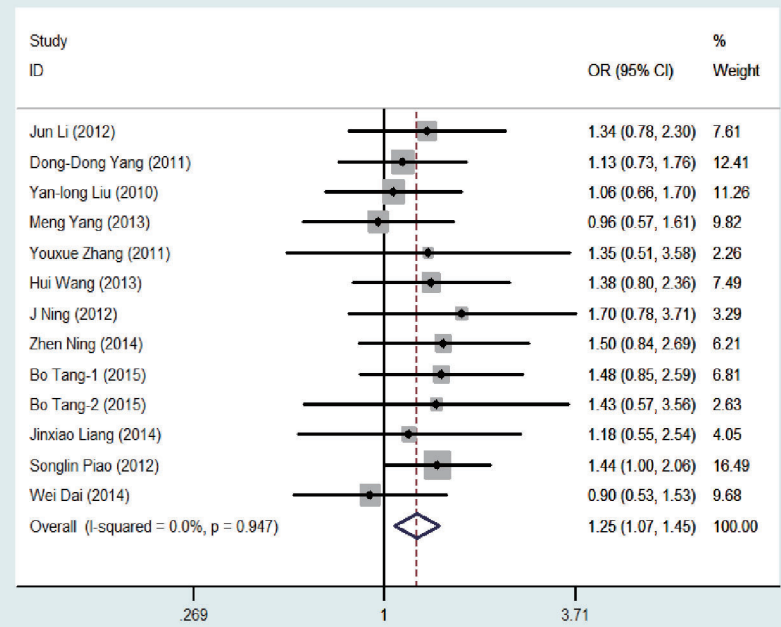

Meta-analysis estimates, given named study is omitted

| Lower CI Limit      ○ Estimate      | Upper CI Limit

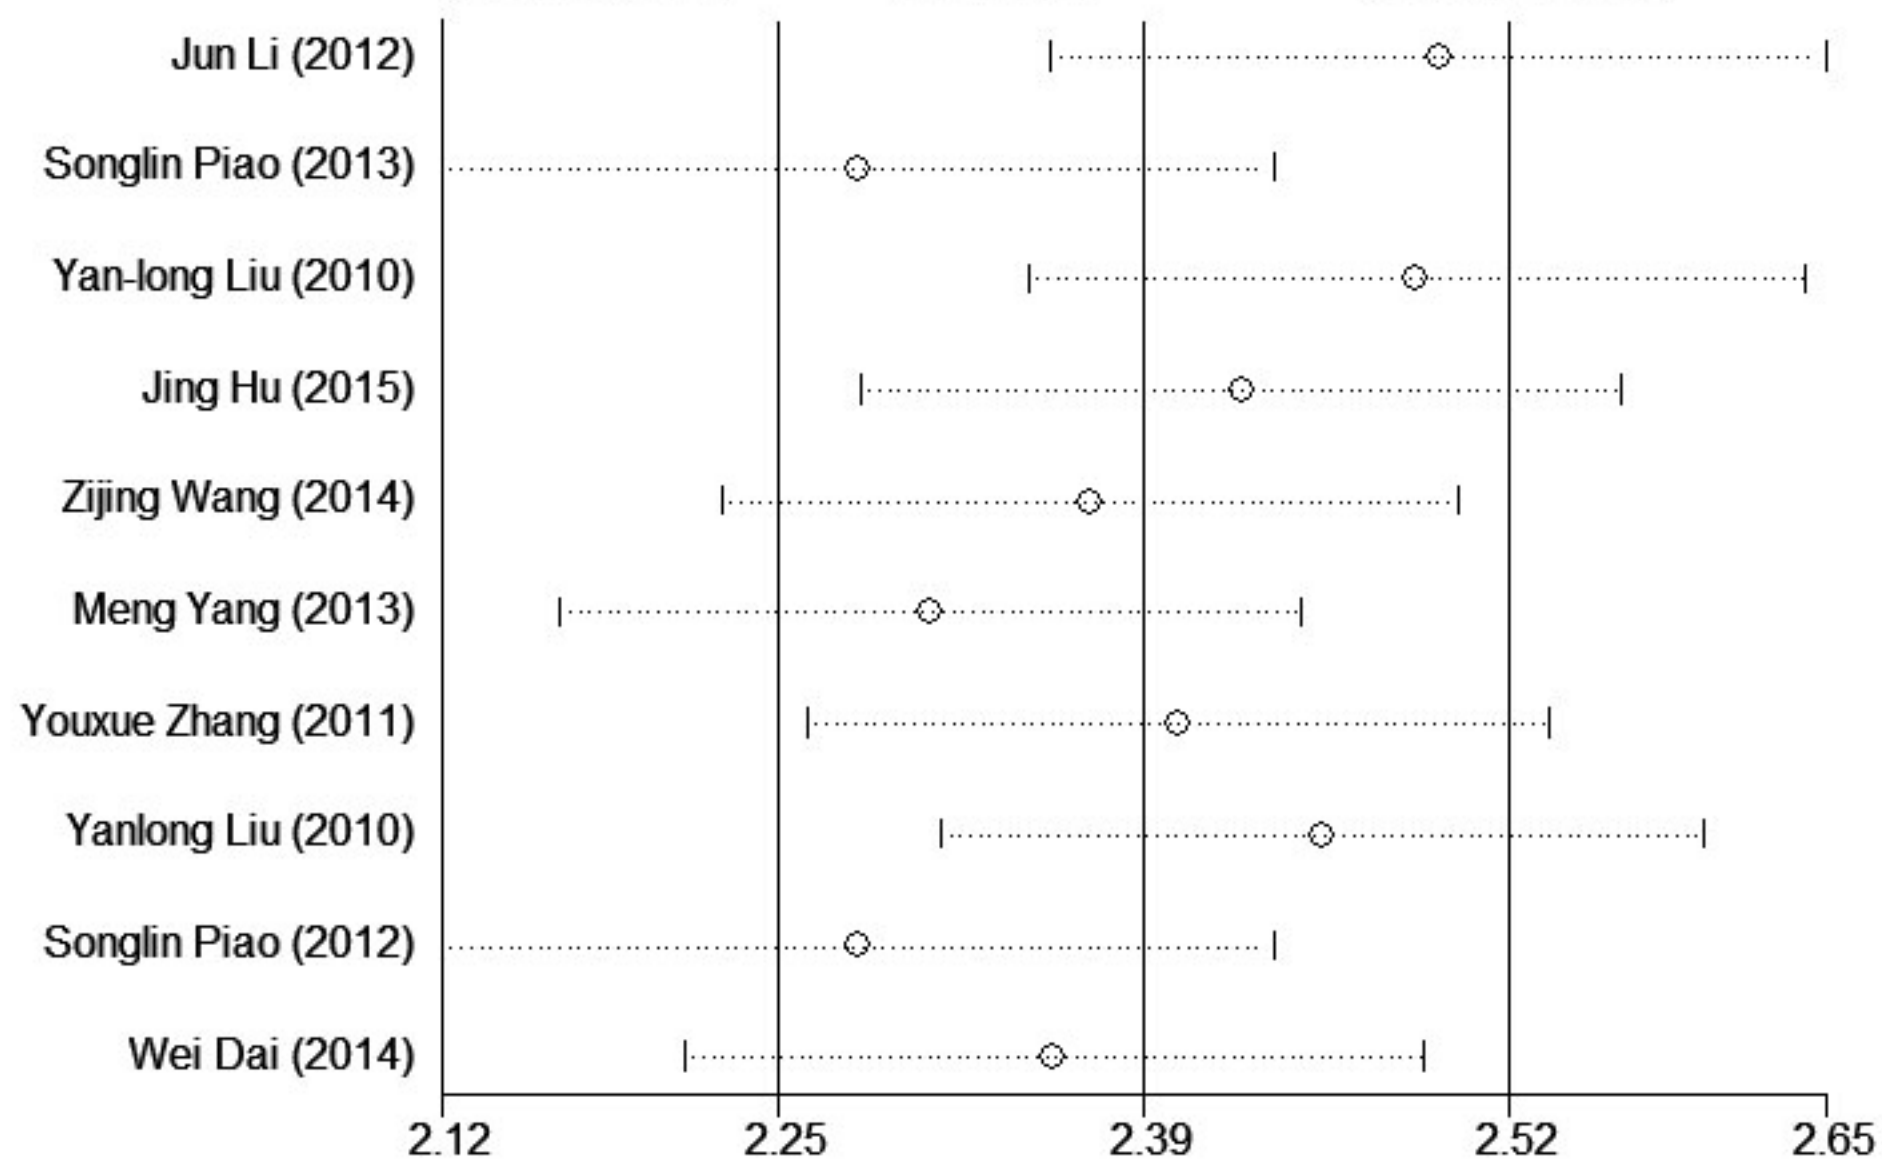

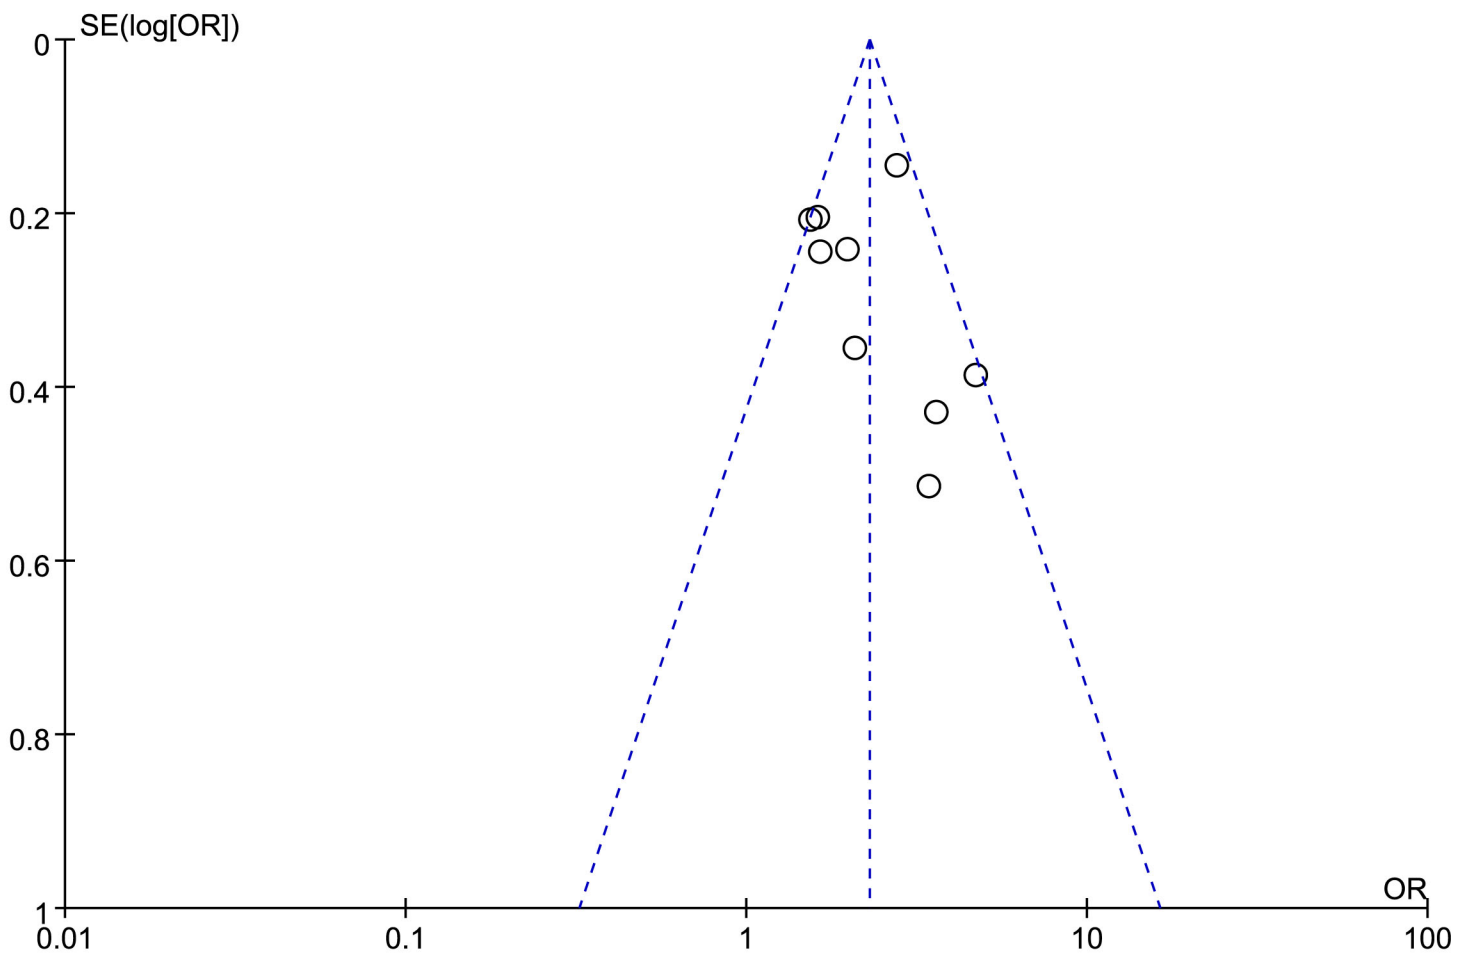

## Begg's Test

adj. Kendall's Score (P-Q) = 32  
 Std. Dev. of Score = 20.21 (corrected for ties)  
 Number of Studies = 15  
 z = 1.58  
 Pr > |z| = 0.113  
 z = 1.53 (continuity corrected)  
 Pr > |z| = 0.125 (continuity corrected)

## Egger's test

| Std_Eff | Coef.    | Std. Err. | t    | P> t  | [95% Conf. Interval] |          |
|---------|----------|-----------|------|-------|----------------------|----------|
| slope   | 1.486136 | .4324795  | 3.44 | 0.004 | .5518203             | 2.420451 |
| bias    | 3.718714 | 2.103437  | 1.77 | 0.101 | -.8254848            | 8.262912 |



## Begg's Test

adj. Kendall's Score (P-Q) = 10  
 Std. Dev. of Score = 11.18 (corrected for ties)  
 Number of Studies = 10  
 z = 0.89  
 Pr > |z| = 0.371  
 z = 0.80 (continuity corrected)  
 Pr > |z| = 0.421 (continuity corrected)

## Egger's test

| Std_Eff | Coef.    | Std. Err. | t    | P> t  | [95% Conf. Interval] |          |
|---------|----------|-----------|------|-------|----------------------|----------|
| slope   | 2.018397 | .6687716  | 3.02 | 0.017 | .4762072             | 3.560587 |
| bias    | 1.758469 | 2.971744  | 0.59 | 0.570 | -5.094385            | 8.611323 |

Table S1: Quality assessment of studies enrolled using the NEWCASTLE-OTTAWA QUALITY ASSESSMENT SCALE

| Study (author, year)  | selection |   |   |   | comparability | outcome |   |   | scores |
|-----------------------|-----------|---|---|---|---------------|---------|---|---|--------|
|                       | 1         | 2 | 3 | 4 |               | 1       | 2 | 3 |        |
| Jun Li (2012)         | ★         | ★ | - | ★ | ★★            | -       | ★ | ★ | 7      |
| Songlin Piao (2013)   | ★         | ★ | ★ | ★ | ★             | ★       | ★ | ★ | 8      |
| Dong-Dong Yang (2011) | ★         | ★ | ★ | - | ★★            | ★       | ★ | ★ | 8      |
| Yan-long (2010)       | ★         | ★ | ★ | ★ | ★★            | -       | ★ | - | 7      |
| Jing Hu (2015)        | ★         | - | ★ | ★ | ★             | ★       | - | ★ | 7      |
| Zijing Wang (2014)    | -         | ★ | - | ★ | ★★            | ★       | ★ | ★ | 7      |
| Meng Yang (2013)      | ★         | - | ★ | ★ | ★★            | ★       | ★ | ★ | 8      |
| Youxue Zhang (2011)   | ★         | ★ | ★ | ★ | ★★            | ★       | ★ | ★ | 9      |
| Jun Liang (2014)      | ★         | ★ | ★ | ★ | ★             | -       | ★ | ★ | 7      |

---

|                      |   |   |   |   |    |   |   |   |   |
|----------------------|---|---|---|---|----|---|---|---|---|
| Hui Wang (2013)      | ★ | ★ | ★ | ★ | ★★ | ★ | - | ★ | 8 |
| J Ning (2012)        | ★ | ★ | - | ★ | ★★ | ★ | ★ | ★ | 8 |
| Zhen Ning (2014)     | - | ★ | ★ | ★ | ★  | ★ | ★ | ★ | 7 |
| Bo Tang-1 (2015)     | ★ | ★ | ★ | - | ★★ | ★ | ★ | ★ | 8 |
| Yanlong Liu (2010)   | ★ | ★ | ★ | ★ | ★  | - | ★ | ★ | 7 |
| Bo Tang-2 (2015)     | ★ | ★ | ★ | ★ | ★★ | ★ | ★ | ★ | 9 |
| Hua-Dong Zhao (2016) | ★ | ★ | ★ | - | ★★ | - | ★ | ★ | 7 |
| Jinxiao Liang (2014) | - | ★ | - | ★ | ★★ | ★ | ★ | - | 6 |
| Songlin Piao (2012)  | ★ | ★ | ★ | ★ | ★★ | ★ | - | ★ | 8 |
| Wei Dai (2014)       | ★ | ★ | ★ | ★ | ★★ | ★ | ★ | ★ | 9 |

---
